# Supplementary material
Source: publisher figshare collection journal article supplement (https://gsajournals.figshare.com/articles/dataset/_/14098952)
Supplement: Supplementary file 1 [file 1]

## Supplemental material

# Optimal breeding value prediction using a Sparse Selection Index

Marco Lopez-Cruz\* & Gustavo de los Campos<sup>†, ‡, §, 1</sup>

\* Department of Plant, Soil and Microbial Sciences, Michigan State University, East Lansing, MI, 48824, USA.

<sup>†</sup> Department of Epidemiology and Biostatistics, Michigan State University, East Lansing, MI, 48824, USA.

<sup>‡</sup> Department of Statistics and Probability, Michigan State University, East Lansing, MI, 48824, USA.

<sup>§</sup> Institute for Quantitative Health Science and Engineering, Michigan State University, East Lansing, MI, 48824, USA

<sup>1</sup> Corresponding author. Institute for Quantitative Health Science and Engineering, 775 Woodlot Dr, Office 1311, East Lansing, MI, 48824, USA. Tel: +1(517)884-7607. E-mail: [gustavoc@msu.edu](mailto:gustavoc@msu.edu)

## FIGURES

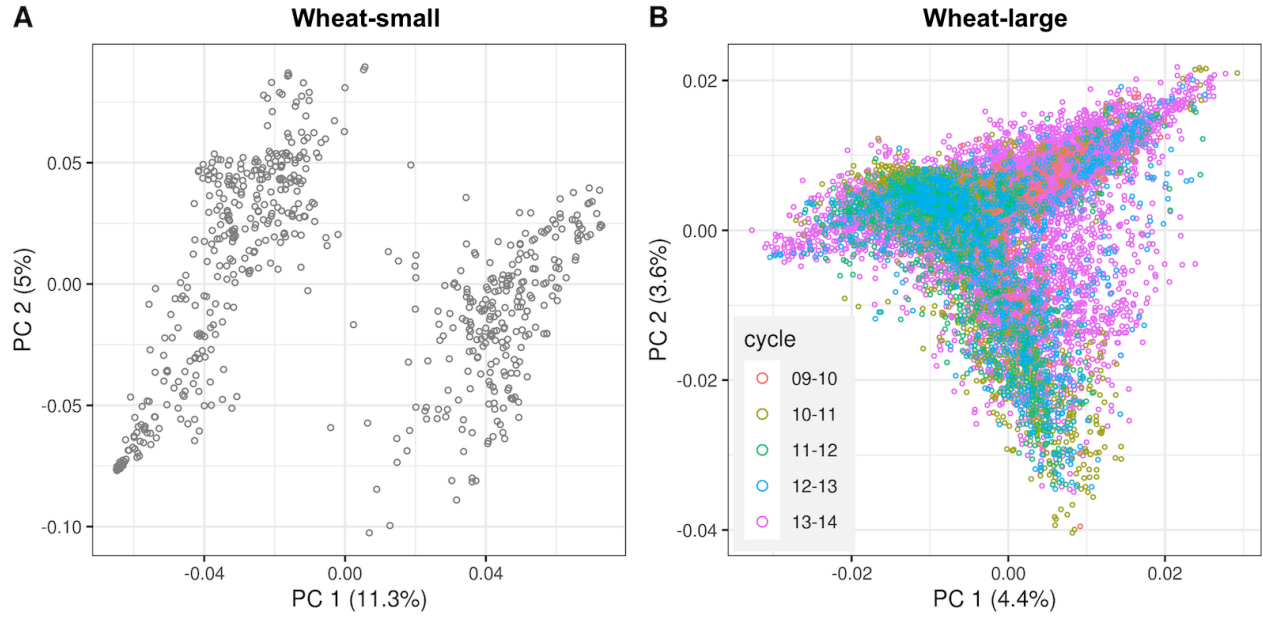

**Figure S1.** Top two principal components of the genomic relationship matrix,  $G$ , for each data set. Each point represents individuals. (A) Wheat-small data set. (B) Wheat-large data set. Individuals are color-grouped by the cycle (sowing-harvest year).

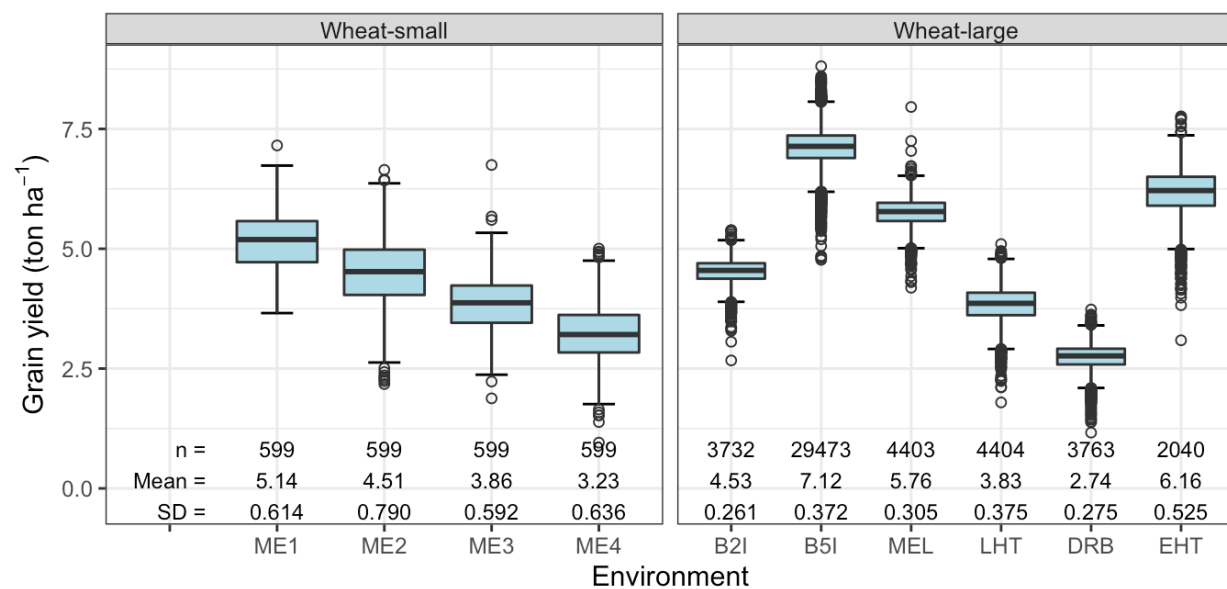

**Figure S2.** Boxplot of grain yield phenotypic records (in ton ha<sup>-1</sup>) by environmental condition for both Wheat-small and Wheat-large data sets. SD standard deviation.

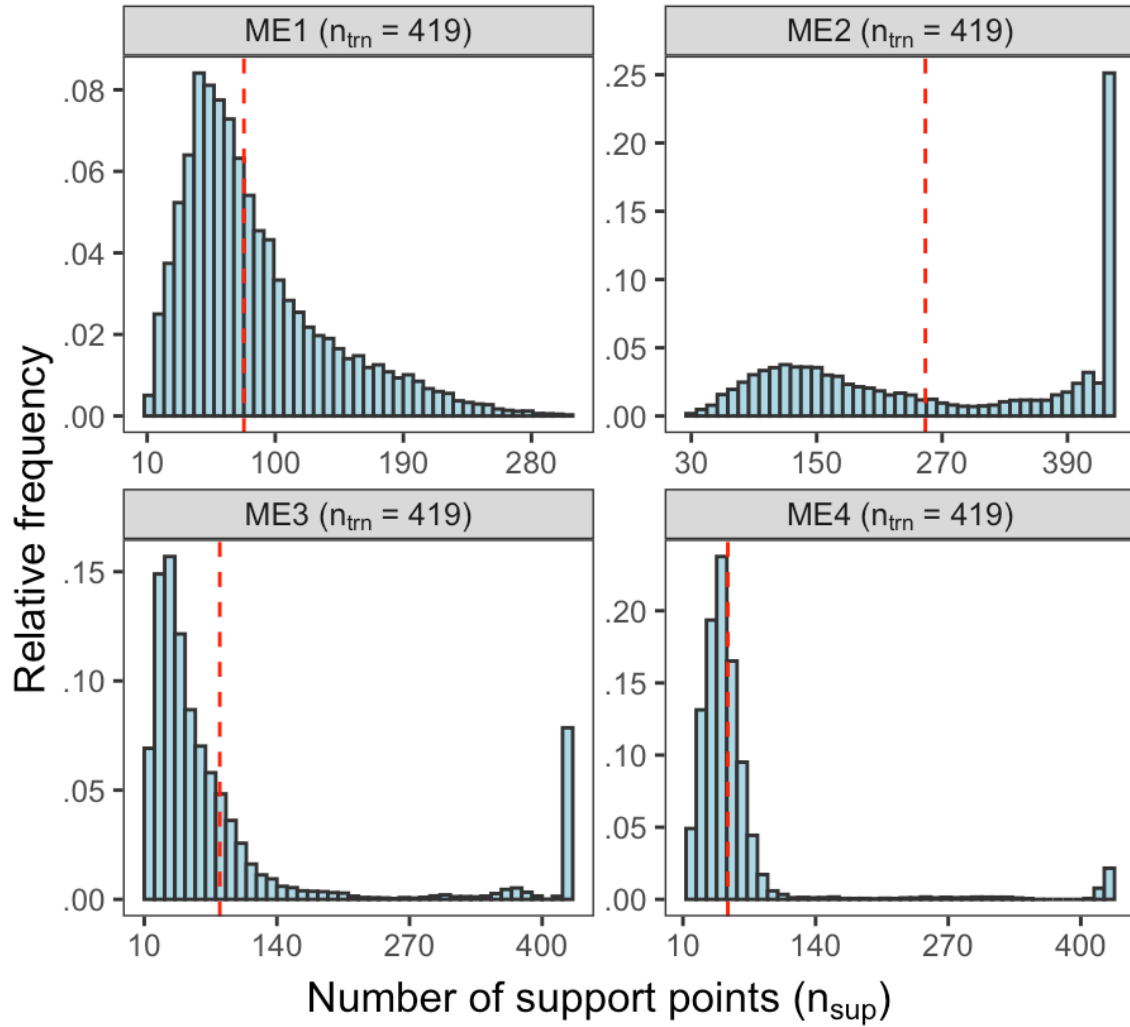

**Figure S3.** Distribution of the number of training support points ( $n_{sup}$ ) in the optimal SSI for grain yield (results obtained over 100 trn-tst partitions;  $n_{trn}$  = size of the training data set), by environmental condition (ME: mega-environment), Wheat-small data set.

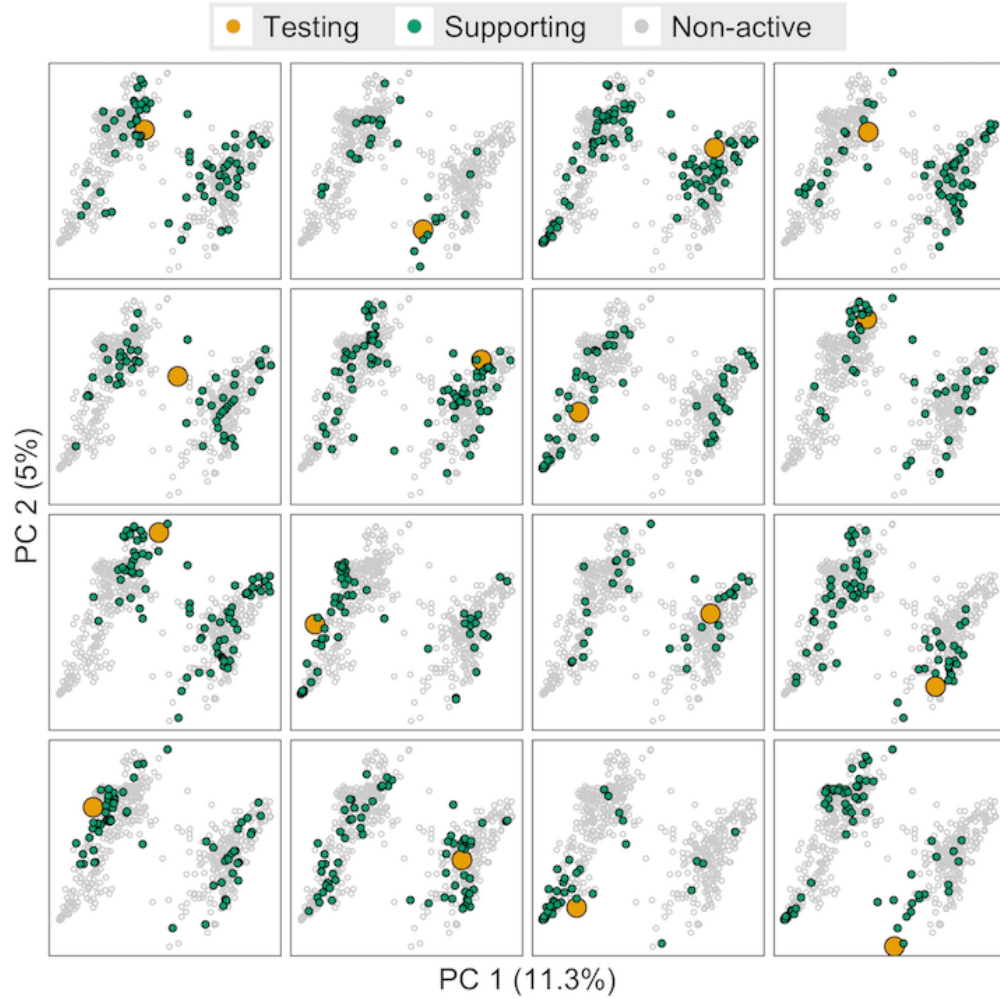

**Figure S4.** First two principal components coordinates for prediction points (yellow) and the corresponding support points (green). Grey points represent genotypes that did not contribute to the prediction of the genetic value of grain yield of the genotype in yellow. All panels represent solutions for the mega-environment ME1, Wheat-small data set.

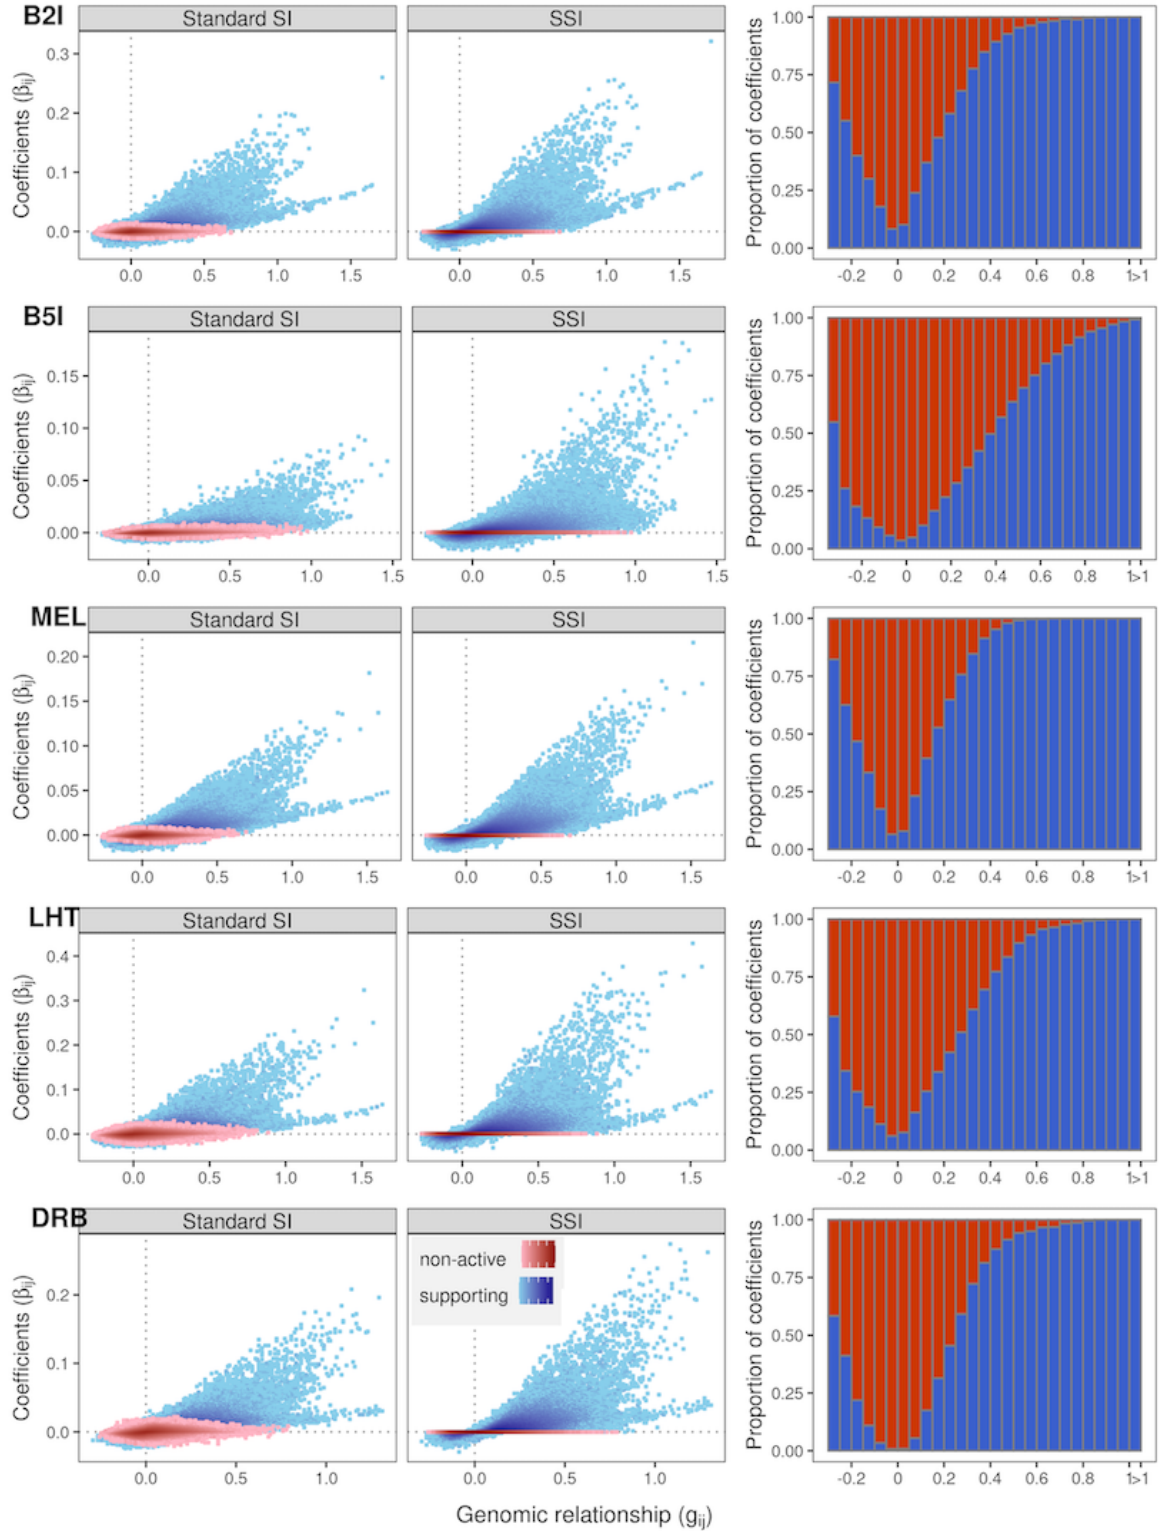

**Figure S5.** (left and center) Weights ( $\beta_{ij}$ ) of a standard SI (G-BLUP) and of the optimal SSI versus the genomic relationship ( $g_{ij}$ ), and (right) proportion of weights in the SSI that belonged to either the supporting or non-active sets, by genomic-relationship; by environment, Wheat-large data set.

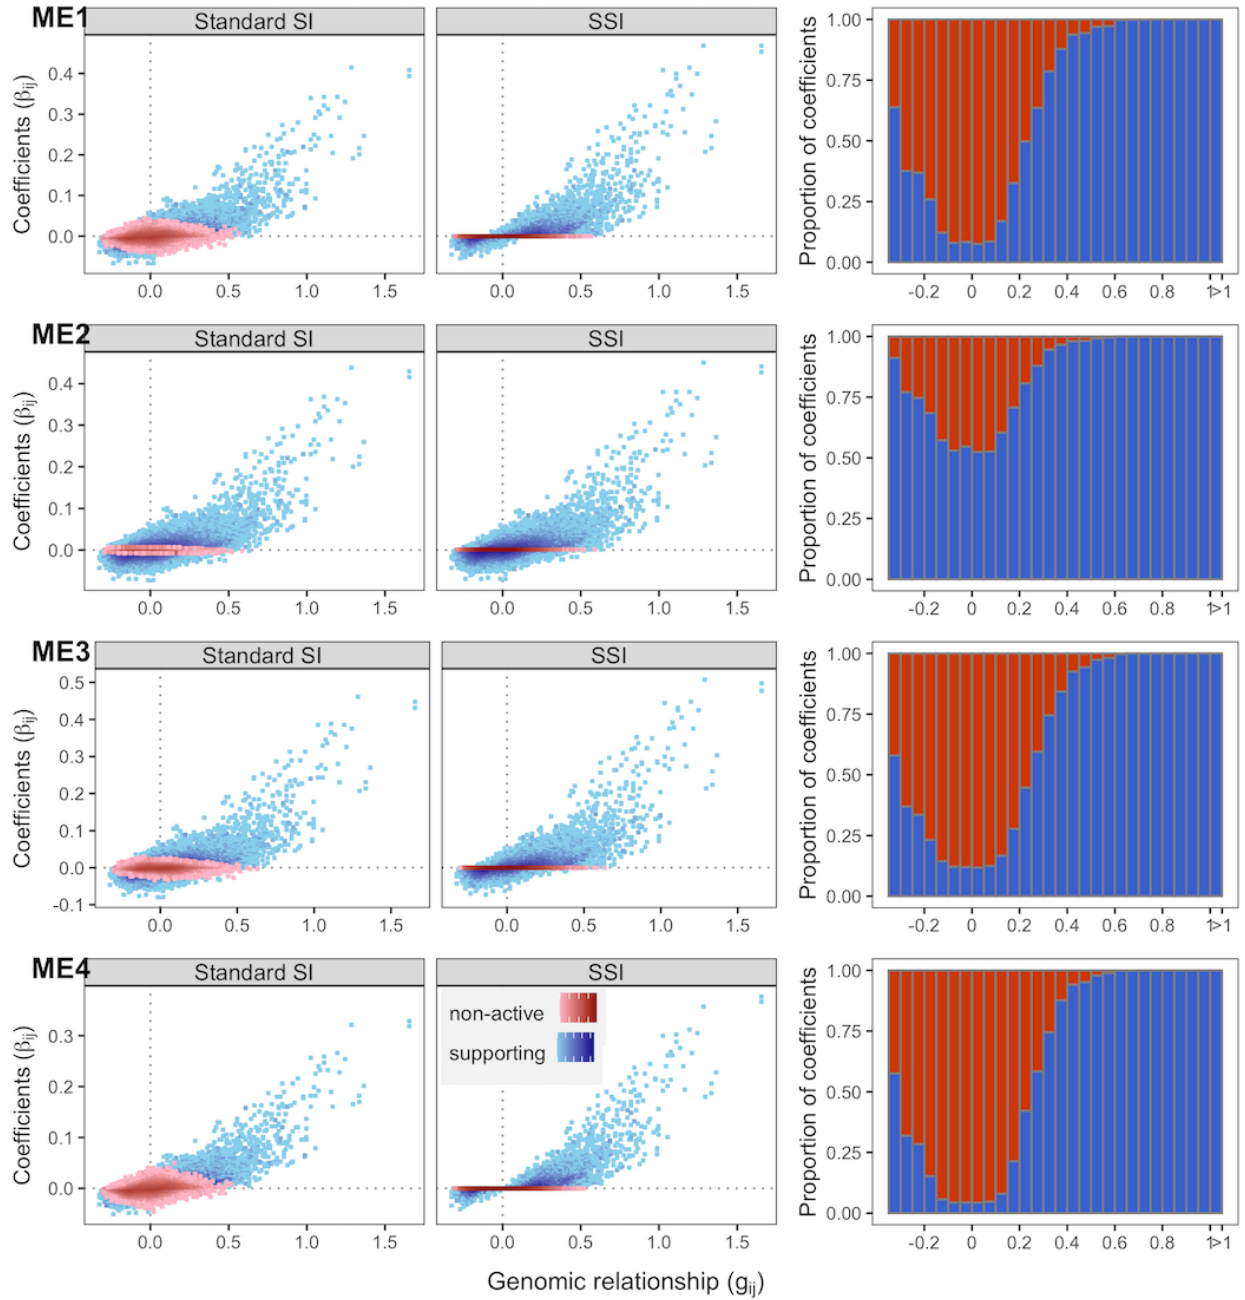

**Figure S6.** (left and center) Weights ( $\beta_{ij}$ ) of a standard SI (G-BLUP) and of the optimal SSI versus the genomic relationship ( $g_{ij}$ ), and (right) proportion of weights in the SSI that belonged to either the supporting or non-active sets, by genomic-relationship; by environment, Wheat-small data set.

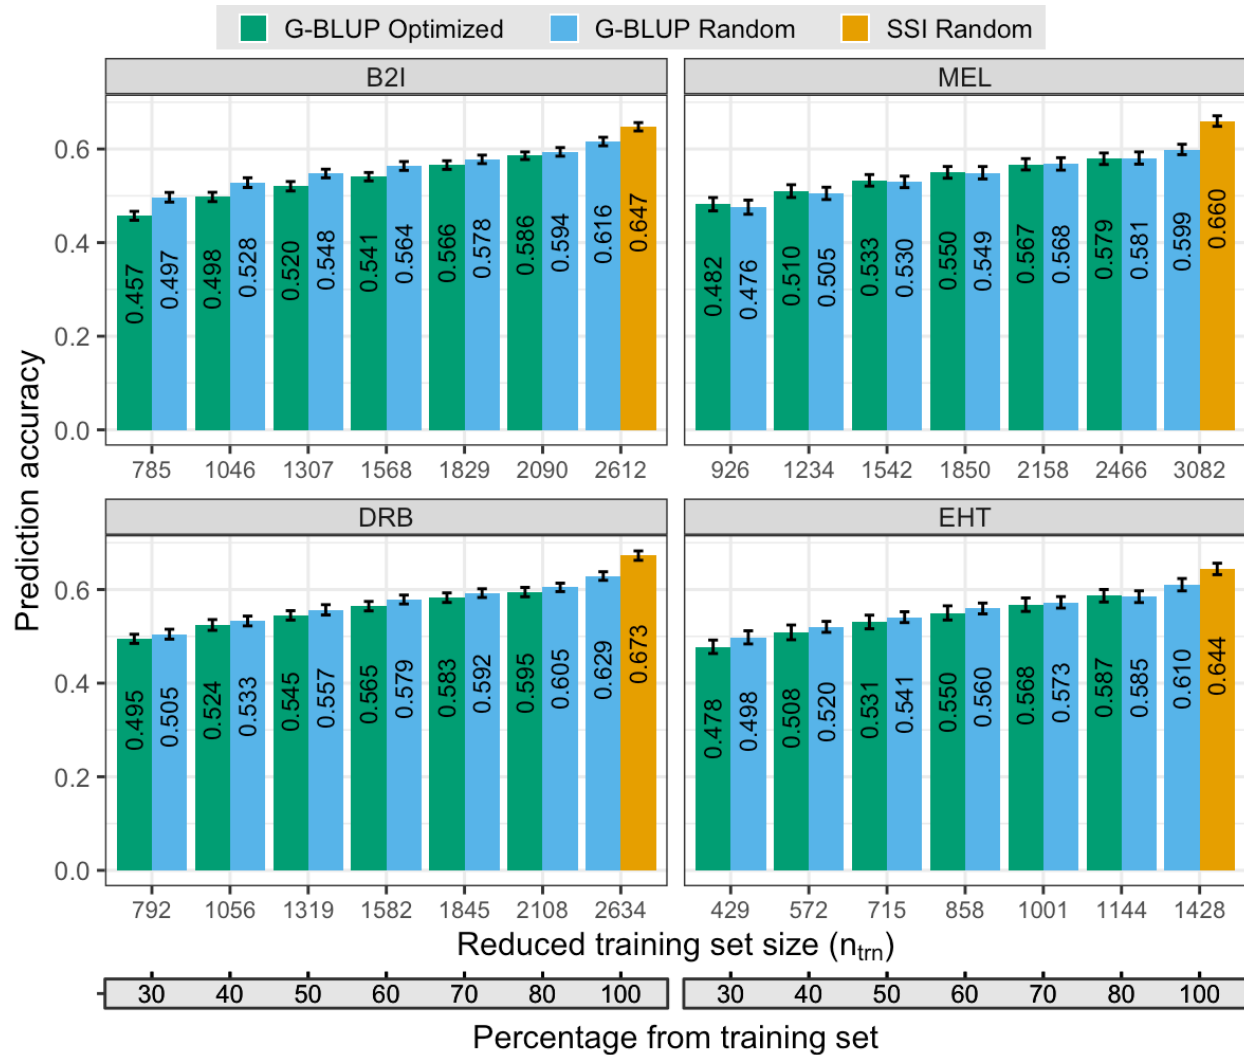

**Figure S7.** Prediction accuracy for grain yield (average over 50 partitions) of the optimal SSI and of the G-BLUP. For each training-testing (trn-tst) partition, the testing set (30%) was predicted using the (random) training set (70%) with the SSI and G-BLUP. Then, the same testing set was predicted with the initial training set reduced to 80%, 70%, ..., 30% of its initial size by: (i) randomly sampling (G-BLUP Random) and (ii) selection using the expected reliability (CDmean) optimization criteria (G-BLUP Optimized, as described in Rincent *et al.* 2012 and implemented in the STPGA R-package, Akdemir *et al.*, 2015). By environmental condition (B2I: bed planting + 2 irrigations, MEL: flat planting + 5 irrigations, EHT: early planting date, DRB: bed planting + drip irrigation), Wheat-large data set.



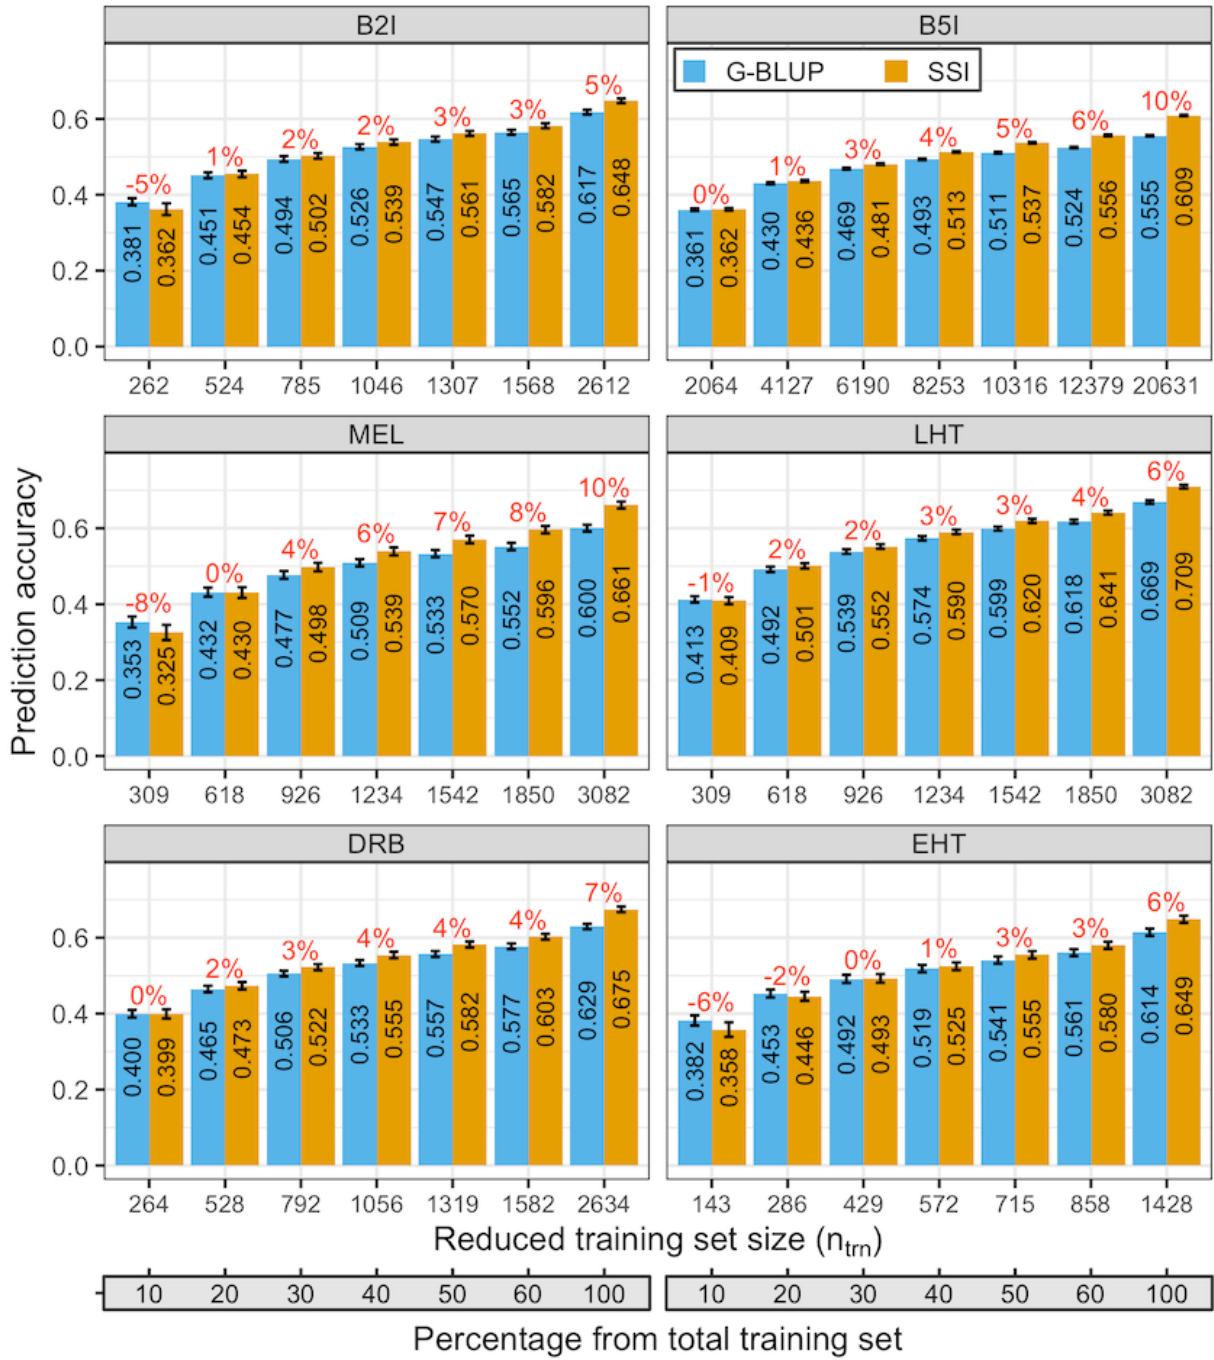

**Figure S8.** Prediction accuracy for grain yield (average over 100 partitions) of the optimal SSI and of the G-BLUP. For each training-testing (trn-tst) partition, the testing set (30%) was predicted using the training set (70%). Then, the same testing set was predicted with the initial training set reduced to 60%, 50%, ..., 10% of its initial size by randomly sampling down. The numbers on top of the bars represent the gain (in percentage) in accuracy of the SSI over the G-BLUP. By environmental condition (B2I: bed planting + 2 irrigations, MEL: flat planting + 5 irrigations, EHT: early planting date, DRB: bed planting + drip irrigation), Wheat-large data set.

## TABLES

**Table S1.** Number of available observations, average grain yield, and heritability by environmental condition for the Wheat-large data set

| <b>Planting conditions</b> |               | <b>Number of irrigations</b> | <b>Name</b> | <b>n</b> | <b>Average (SD) Yield</b> | <b>Heritability (SD)<sup>a</sup></b> |
|----------------------------|---------------|------------------------------|-------------|----------|---------------------------|--------------------------------------|
| <b>Date</b>                | <b>System</b> |                              |             |          |                           |                                      |
| Optimum                    | Bed           | 2                            | B2I         | 3,732    | 4.53 (0.261)              | 0.41 (0.029)                         |
| Optimum                    | Bed           | 5                            | B5I         | 29,473   | 7.12 (0.372)              | 0.57 (0.025)                         |
| Optimum                    | Flat          | 5                            | MEL         | 4,403    | 5.76 (0.305)              | 0.23 (0.025)                         |
| Late                       | Bed           | 5                            | LHT         | 4,404    | 3.83 (0.375)              | 0.51 (0.025)                         |
| Optimum                    | Bed           | Minimal                      | DRB         | 3,763    | 2.74 (0.275)              | 0.38 (0.029)                         |
| Early                      | Bed           | 5                            | EHT         | 2,040    | 6.16 (0.525)              | 0.41 (0.038)                         |

SD. Standard deviation. <sup>a</sup>Posterior mean and SD obtained across 10,000 Monte Carlo replicates using Gibbs sampling.

**Table S2.** Number of available observations, average grain yield, and heritability by environmental condition for the Wheat-small data set

| <b>Moisture regime</b>           | <b>Temperature</b> | <b>Name</b> | <b>n</b> | <b>Average (SD) Yield</b> | <b>Heritability (SD)<sup>a</sup></b> |
|----------------------------------|--------------------|-------------|----------|---------------------------|--------------------------------------|
|                                  |                    |             |          |                           |                                      |
| Optimal irrigation, low rainfall | Optimal            | ME1         | 599      | 5.14 (0.614)              | 0.50 (0.054)                         |
| High rainfall                    | Optimal            | ME2         | 599      | 4.51 (0.790)              | 0.46 (0.056)                         |
| Low rainfall                     | High drought       | ME3         | 599      | 3.86 (0.592)              | 0.43 (0.062)                         |
| Irrigation or rainfall           | Hot, low humidity  | ME4         | 599      | 3.23 (0.636)              | 0.44 (0.061)                         |

SD. Standard deviation. <sup>a</sup>Posterior mean and SD obtained across 10,000 Monte Carlo replicates using Gibbs sampling.

**Table S3.** Prediction accuracy for grain yield (average across 50 partitions) achieved by the SSI for different values of the parameter  $\alpha$  of an Elastic-Net-type SSI, by environmental condition for the Wheat-large data set

| Environment | $\lambda_0^a$ | $\alpha$ | $\lambda_{opt}^b$ | $n_{sup}^c$ | Accuracy (SD) |
|-------------|---------------|----------|-------------------|-------------|---------------|
| B2I         | 1.5320        | 1.00     | 0.0141            | 395         | 0.649 (0.032) |
|             | 0.7660        | 0.25     | 0.0667            | 320         | 0.663 (0.032) |
|             |               | 0.50     | 0.0320            | 330         | 0.664 (0.032) |
|             |               | 0.75     | 0.0233            | 290         | 0.664 (0.032) |
|             |               | 1.00     | 0.0155            | 338         | 0.664 (0.032) |
| B5I         | 1.8412        | 1.00     | 0.0119            | 1,226       | 0.610 (0.009) |
|             | 0.9215        | 0.25     | 0.0460            | 1,187       | 0.630 (0.009) |
|             |               | 0.50     | 0.0223            | 1,203       | 0.631 (0.009) |
|             |               | 0.75     | 0.0164            | 1,044       | 0.631 (0.009) |
|             |               | 1.00     | 0.0132            | 943         | 0.631 (0.009) |
| MEL         | 3.7934        | 1.00     | 0.0116            | 561         | 0.665 (0.046) |
|             | 1.8967        | 0.25     | 0.0705            | 338         | 0.685 (0.045) |
|             |               | 0.50     | 0.0406            | 270         | 0.686 (0.045) |
|             |               | 0.75     | 0.0294            | 236         | 0.687 (0.045) |
|             |               | 1.00     | 0.0195            | 282         | 0.687 (0.045) |
| LHT         | 0.9841        | 1.00     | 0.0218            | 237         | 0.712 (0.026) |
|             | 0.4921        | 0.25     | 0.0854            | 248         | 0.727 (0.025) |
|             |               | 0.50     | 0.0491            | 194         | 0.729 (0.025) |
|             |               | 0.75     | 0.0295            | 223         | 0.729 (0.025) |
|             |               | 1.00     | 0.0235            | 202         | 0.730 (0.025) |
| DRB         | 1.7555        | 1.00     | 0.0344            | 103         | 0.679 (0.038) |
|             | 0.8778        | 0.25     | 0.1461            | 102         | 0.694 (0.039) |
|             |               | 0.50     | 0.0823            | 79          | 0.696 (0.039) |
|             |               | 0.75     | 0.0588            | 69          | 0.697 (0.040) |
|             |               | 1.00     | 0.0386            | 85          | 0.697 (0.040) |
| EHT         | 1.5514        | 1.00     | 0.0284            | 120         | 0.657 (0.046) |
|             | 0.7757        | 0.25     | 0.0970            | 159         | 0.670 (0.048) |
|             |               | 0.50     | 0.0554            | 126         | 0.672 (0.048) |
|             |               | 0.75     | 0.0399            | 110         | 0.672 (0.048) |
|             |               | 1.00     | 0.0264            | 133         | 0.673 (0.048) |

SD: Standard deviation across the 50 training-testing partitions. <sup>a</sup>Shrinkage factor involved in the standard SI (Equation 2). Within environment, in the top row a value of  $\lambda_0$  was used as in the G-BLUP and in rows below,  $\lambda_0$  was reduced to half. <sup>b</sup>Optimal value of  $\lambda$  (average across partitions) estimated by cross-validating the training set. <sup>c</sup>Average number of support points in the SSIs.

**Table S4.** Prediction accuracy for grain yield (average across 50 partitions) achieved by the SSI for different values of the parameter  $\alpha$  of an Elastic-Net-type SSI, by environmental condition for the Wheat-small data set

| Environment | $\lambda_0^a$ | $\alpha$ | $\lambda_{opt}^b$ | $n_{sup}^c$ | Accuracy (SD) |
|-------------|---------------|----------|-------------------|-------------|---------------|
| ME1         | 1.2101        | 1.00     | 0.0314            | 84          | 0.769 (0.062) |
|             | 0.5061        | 0.25     | 0.1042            | 99          | 0.772 (0.063) |
|             |               | 0.50     | 0.0492            | 101         | 0.773 (0.063) |
|             |               | 0.75     | 0.0296            | 110         | 0.773 (0.063) |
|             |               | 1.00     | 0.0236            | 103         | 0.773 (0.063) |
| ME2         | 1.3034        | 1.00     | 0.0175            | 151         | 0.708 (0.085) |
|             | 0.6517        | 0.25     | 0.0686            | 147         | 0.711 (0.086) |
|             |               | 0.50     | 0.0397            | 126         | 0.710 (0.086) |
|             |               | 0.75     | 0.0240            | 136         | 0.710 (0.086) |
|             |               | 1.00     | 0.0192            | 129         | 0.710 (0.086) |
| ME3         | 1.4084        | 1.00     | 0.0514            | 50          | 0.609 (0.090) |
|             | 0.7042        | 0.25     | 0.2213            | 48          | 0.611 (0.089) |
|             |               | 0.50     | 0.1017            | 48          | 0.610 (0.090) |
|             |               | 0.75     | 0.0601            | 54          | 0.609 (0.091) |
|             |               | 1.00     | 0.0474            | 50          | 0.609 (0.091) |
| ME4         | 1.4380        | 1.00     | 0.0615            | 40          | 0.722 (0.073) |
|             | 0.7190        | 0.25     | 0.2689            | 39          | 0.727 (0.074) |
|             |               | 0.50     | 0.1483            | 31          | 0.727 (0.074) |
|             |               | 0.75     | 0.0870            | 35          | 0.728 (0.075) |
|             |               | 1.00     | 0.0681            | 32          | 0.728 (0.075) |

SD: Standard deviation across the 50 training-testing partitions. <sup>a</sup>Shrinkage factor involved in the standard SI (Equation 2). Within environment, in the top row a value of  $\lambda_0$  was used as in the G-BLUP and in rows below,  $\lambda_0$  was reduced to half. <sup>b</sup>Optimal value of  $\lambda$  (average across partitions) estimated by cross-validating the training set. <sup>c</sup>Average number of support points in the SSIs.

## REFERENCES

- Akdemir D., J. I. Sanchez, and J.-L. Jannink, 2015 Optimization of genomic selection training populations with a genetic algorithm. *Genet. Sel. Evol.* 47: 1–10.
- Rincent R., S. Nicolas, T. Altmann, D. Brunel, P. Revilla, *et al.*, 2012 Maximizing the reliability of genomic selection by optimizing the calibration set of reference individuals: comparison of methods in two diverse groups of maize inbreds (*Zea mays* L.). *Genetics* 192: 715–728.
